# Supplementary material for: STAT3 serine phosphorylation is required for TLR4 metabolic reprogramming and IL-1β expression
Source: PubMed Central journal article supplement (PMC7393113; doi:10.1038/s41467-020-17669-5), 2020-07-30

## Supplementary Information

**STAT3 Serine phosphorylation is required for TLR4 metabolic reprogramming and IL-1 $\beta$  expression**

Balic et al,

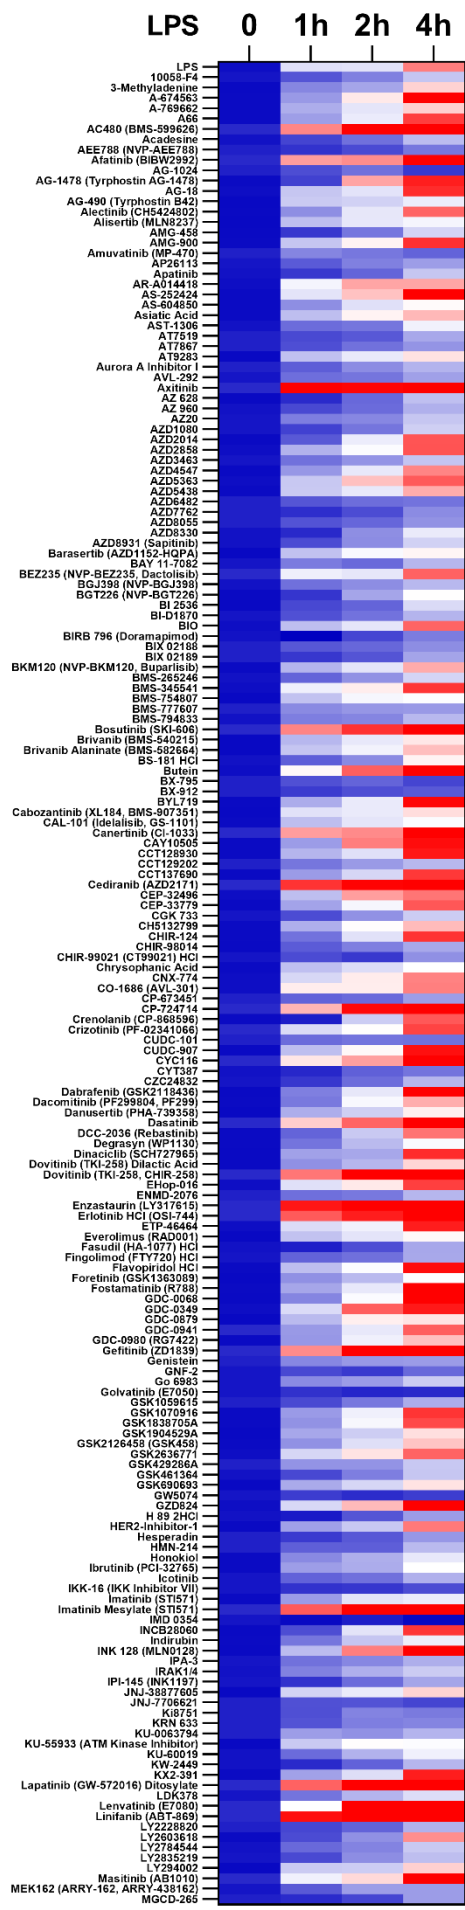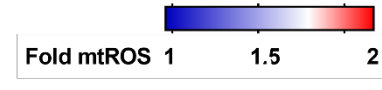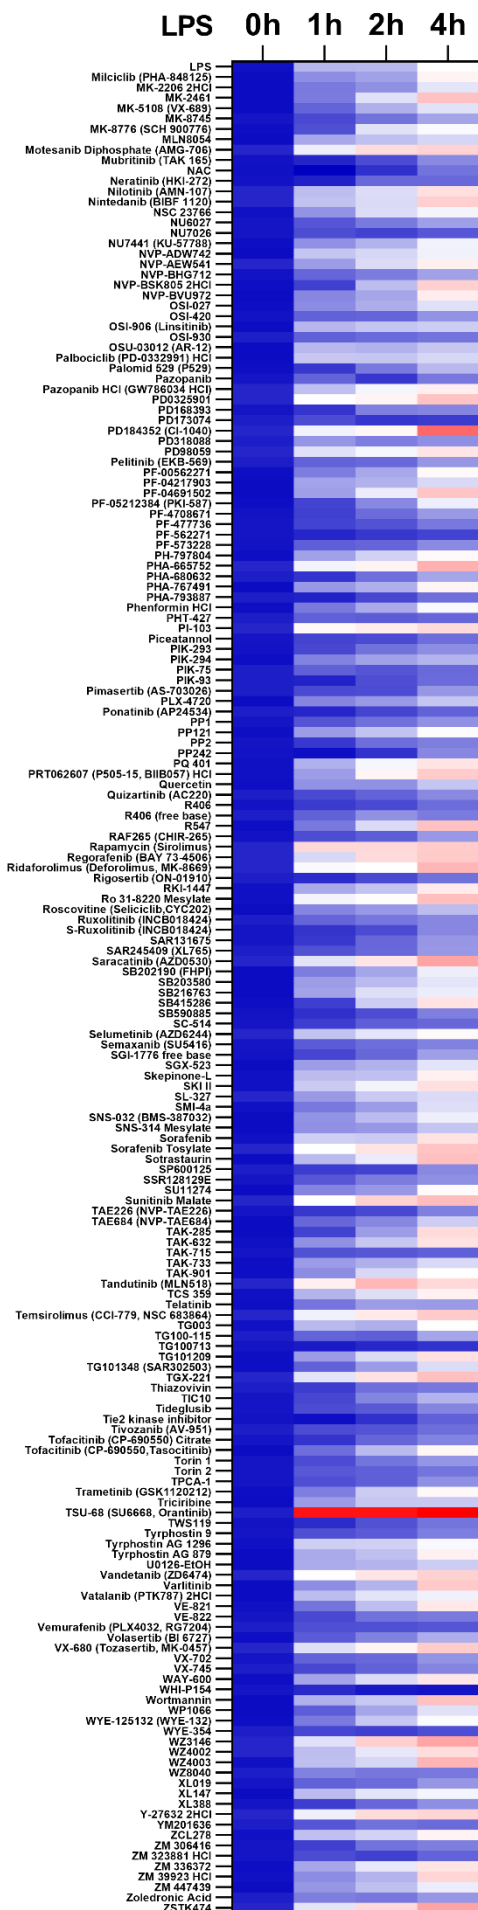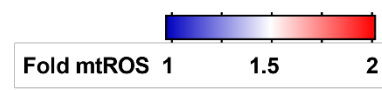

**Supplementary Figure 1. Kinase inhibitors suppress LPS-induced mitochondrial ROS production, Related for Figure 3 and Supplementary Table 1**

iBMDMs were pretreated with kinase inhibitors (500nM; see Supplementary Dataset 1) for 60 mins, and MitoSOX added 10 mins prior to challenge with LPS for indicated times. LPS-induced production of superoxide by mitochondria was analysed by measuring oxidized MitoSOX fluorescence at 580nm in a BMG ClarioStar. Data is represented as the means of 3 biological replicates/inhibitor (see Supplementary Dataset 2). Results are shown as fold increase compared to unstimulated control.

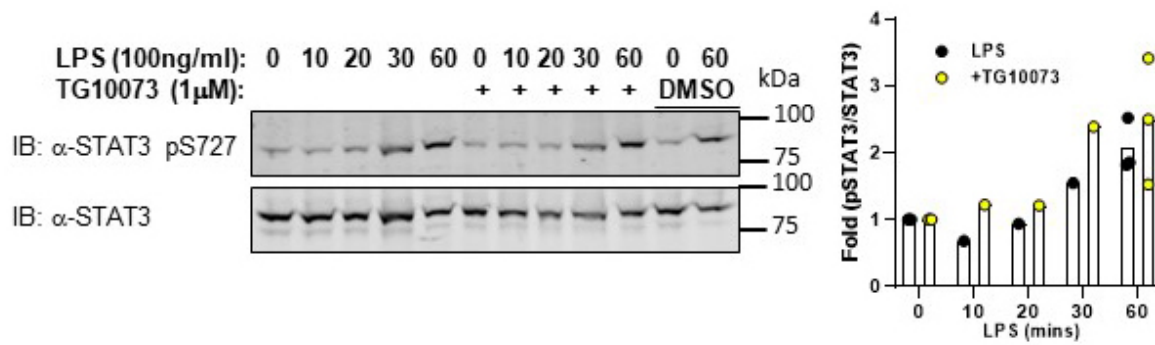

**Supplementary Figure 2. PI3 kinase inhibition does not reduce LPS-induced STAT3 Ser727 phosphorylation.**

The ability of PI3K to induce STAT3 Ser727 phosphorylation was determined by pretreating or not, BMDMs with the our highest ranked PI3K inhibitor TG10073 for 60 mins prior to LPS stimulation for indicated times. STAT3 Ser727 phosphorylation was determined in cell lysates by immunoblot with anti-STAT3 pS727 and anti-STAT3 antibodies. Densitometry was conducted using ImageJ software and presented as fold increase of STAT3 pS727 compared to total STAT3 protein as related to untreated or treated control for each sample (see Supplementary Dataset 3). DMSO alone was added as a solvent control. Data represents 2 biologically independent experiments for timepoints 10, 20 and 30mins post LPS; and 3 independent experiments for timepoints 0 and 60 mins post-LPS challenge.

# Supplemental Figure 3 Full Figure Immunoblots

## Uncropped immunoblots from Figure 1b

IP Samples:  $\alpha$ -STAT3

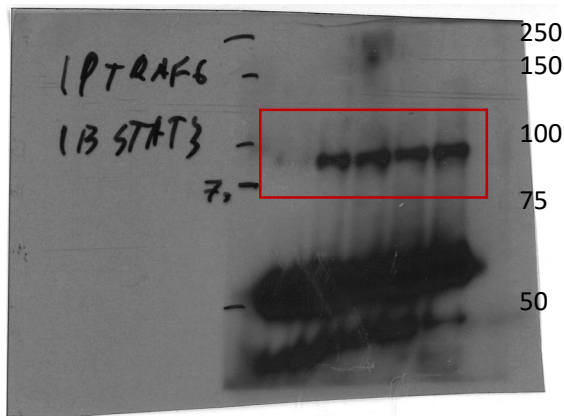

IB Lysates:  $\alpha$ -STAT3

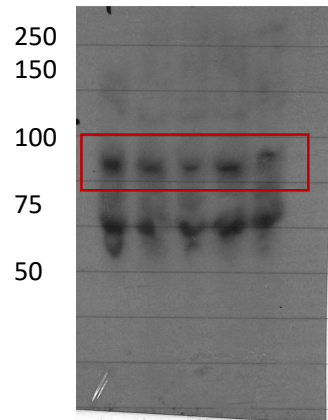

IP Samples:  $\alpha$ -TRAF6

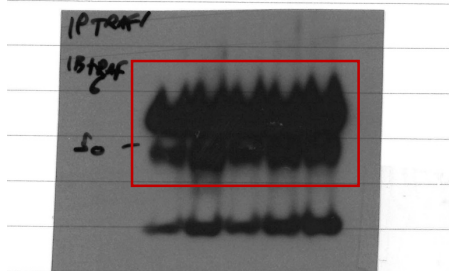

IB Lysates:  $\alpha$ -TRAF6

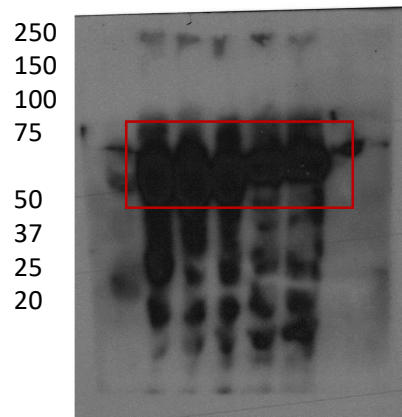

# Uncropped immunoblots from Figure 1c

IP Sample:  $\alpha$ -STAT3

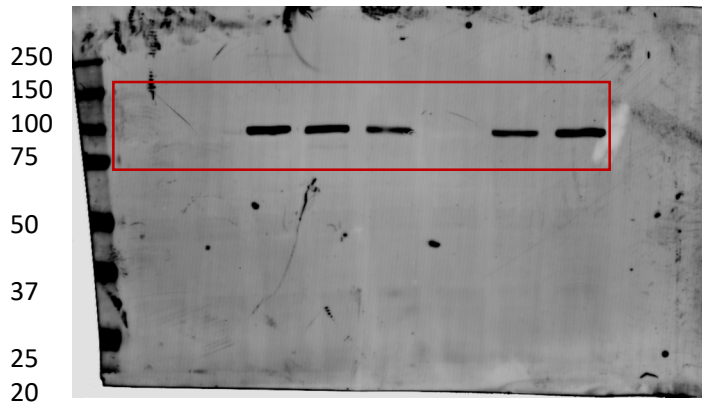

IB Lysates:  $\alpha$ -STAT3

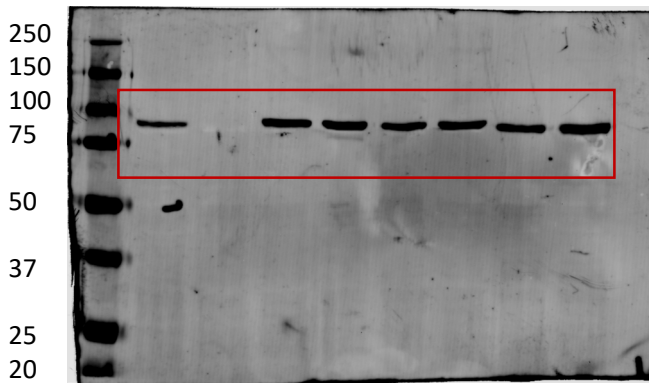

IP Sample:  $\alpha$ -TRAF6

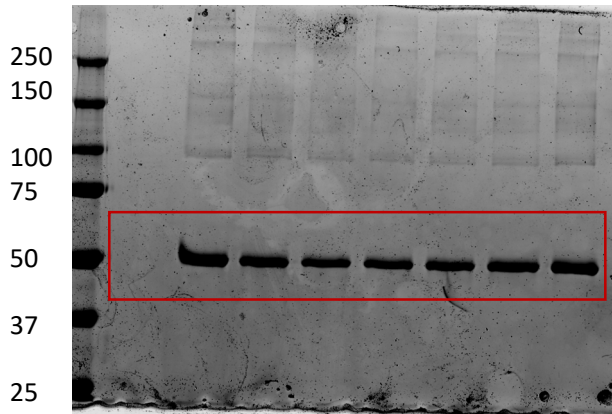

# Uncropped immunoblots from Figure 2a

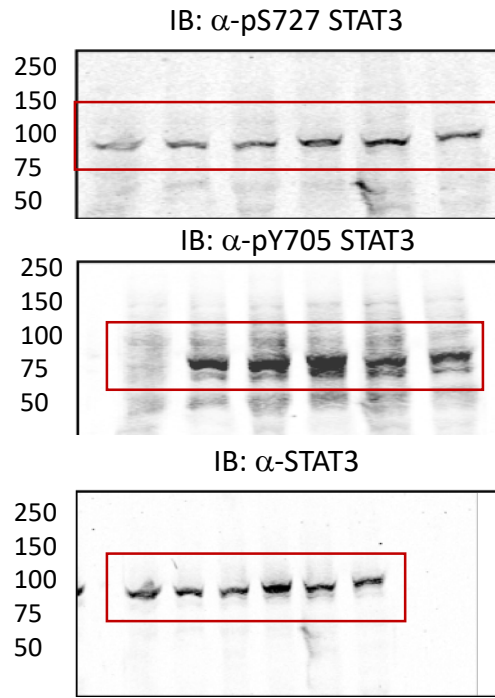

# Uncropped immunoblots from Figure 2b

IB:  $\alpha$ -pS727 STAT3

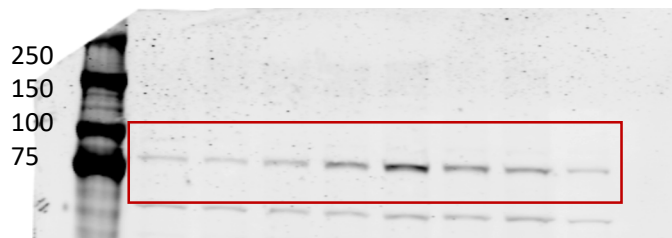

IB:  $\alpha$ -pY705 STAT3

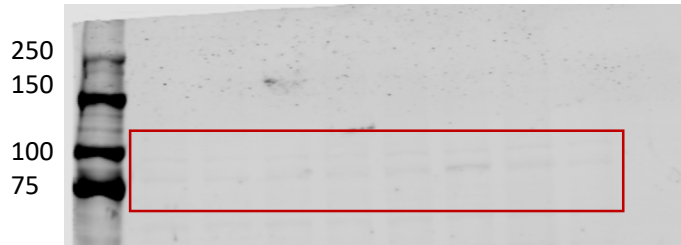

IB:  $\alpha$ -STAT3

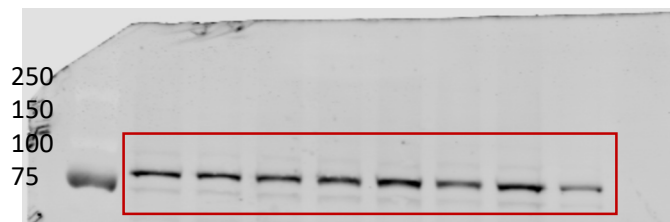



# Uncropped immunoblots from Figure 2c

IB:  $\alpha$ -pY705 STAT3

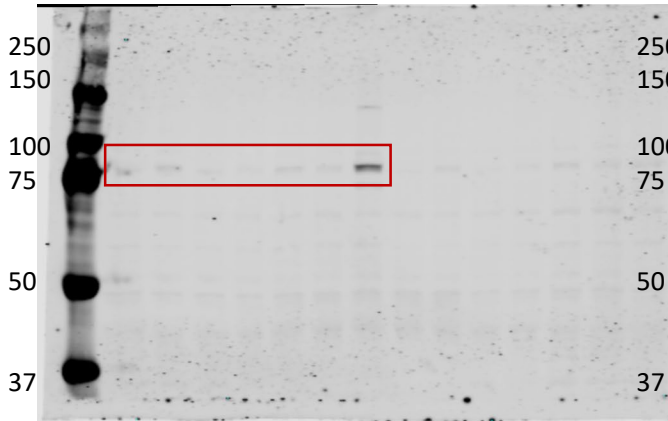

IB:  $\alpha$ -pS727 STAT3

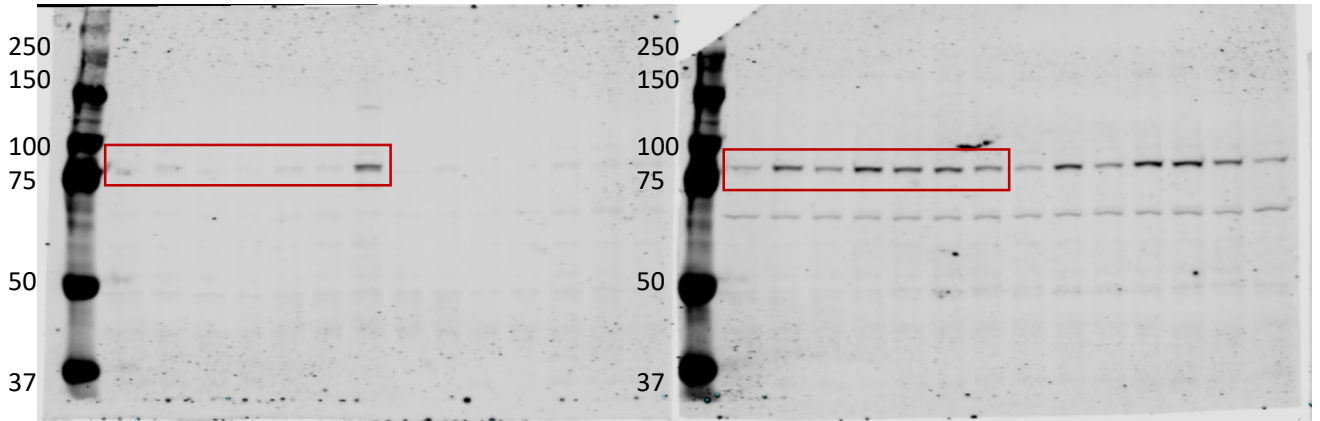

IB:  $\alpha$ -STAT3

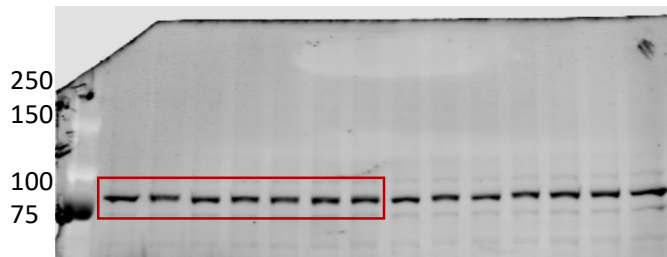

# Uncropped immunoblots from Figure 2d

IB:  $\alpha$ -pS727 STAT3

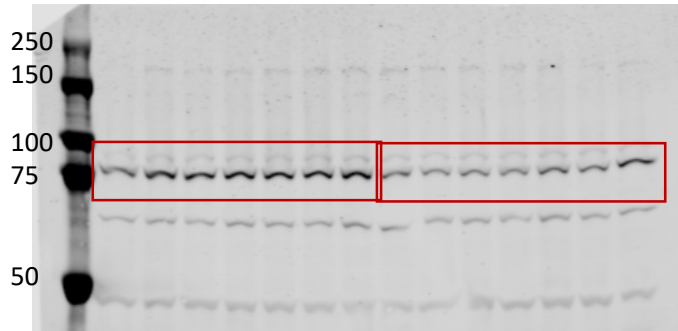

IB:  $\alpha$ -STAT3

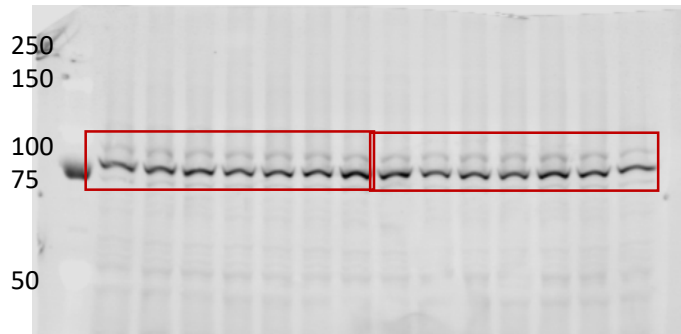

# Uncropped immunoblots from Figure 2e

IB:  $\alpha$ -pS727 STAT3

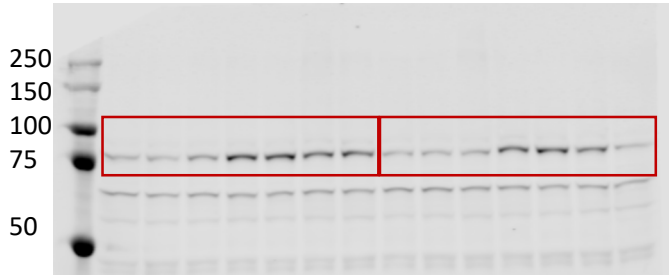

IB:  $\alpha$ -STAT3

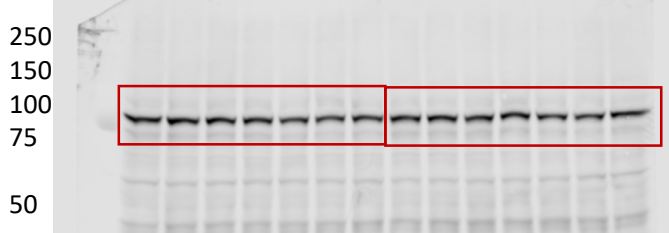

# Uncropped immunoblots from Figure 2f

IB:  $\alpha$ -STAT3

IB:  $\alpha$ -pS727 STAT3

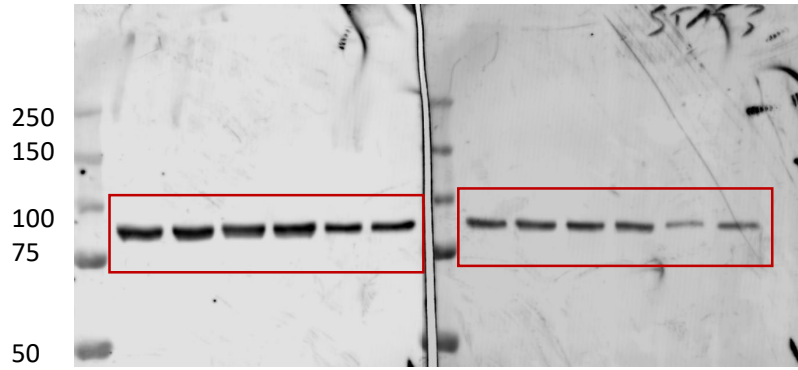

IB:  $\alpha$ -VDAC

IB:  $\alpha$ -ERK1/2

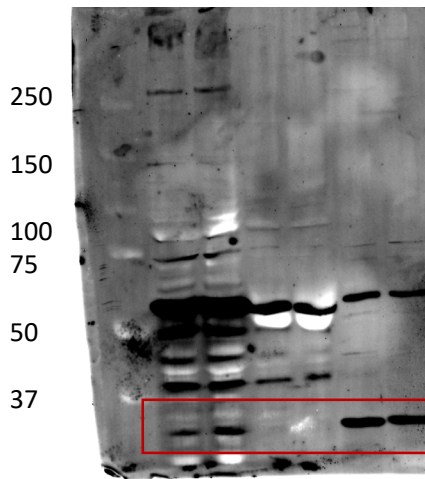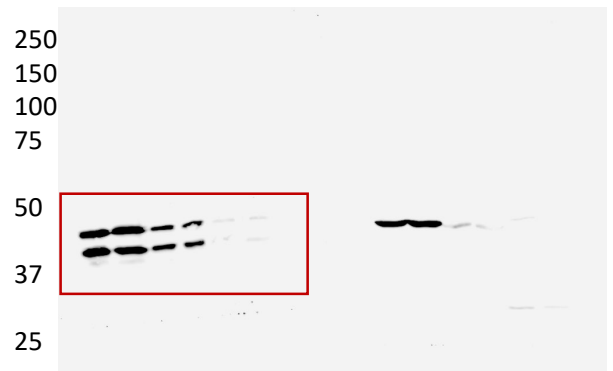

IB:  $\alpha$ -Lamin A/C

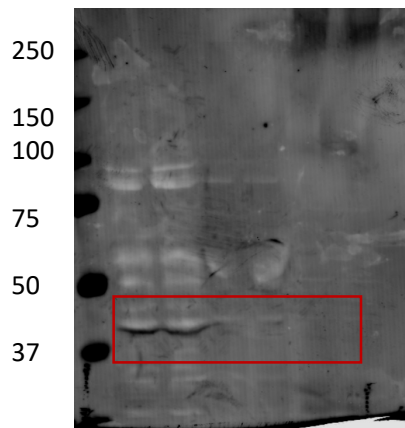

# Uncropped immunoblots from Figure 3b

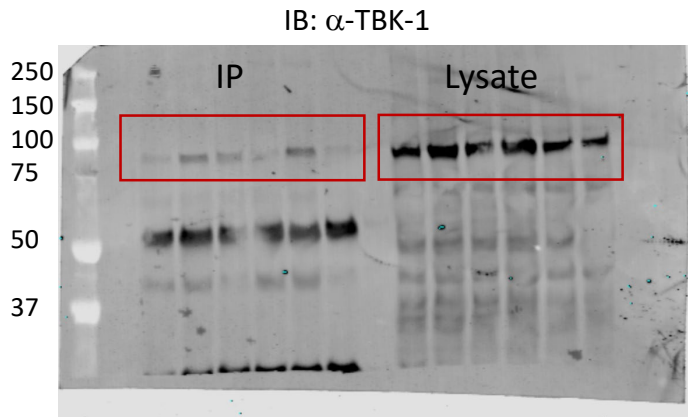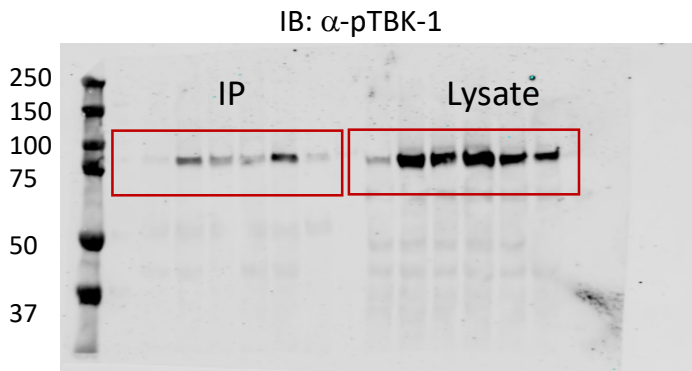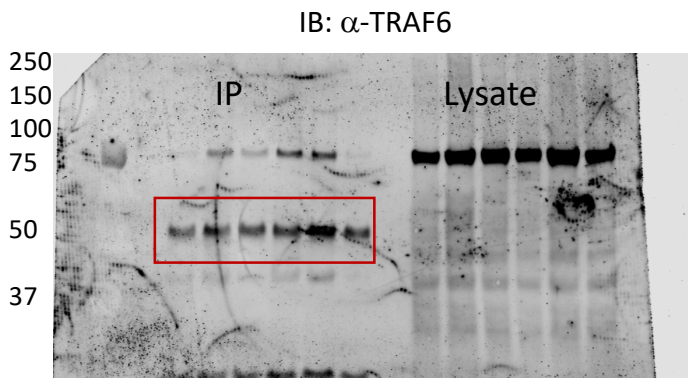

# Uncropped immunoblots from Figure 3c

IB:  $\alpha$ -pTBK-1

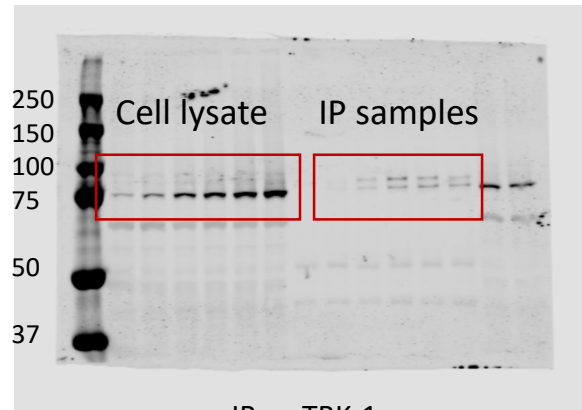

IB:  $\alpha$ -TBK-1

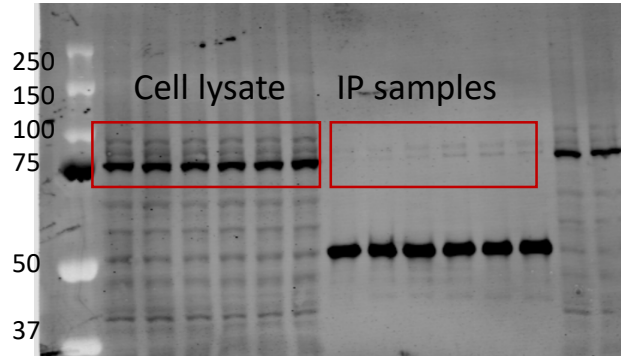

IB:  $\alpha$ -STAT3

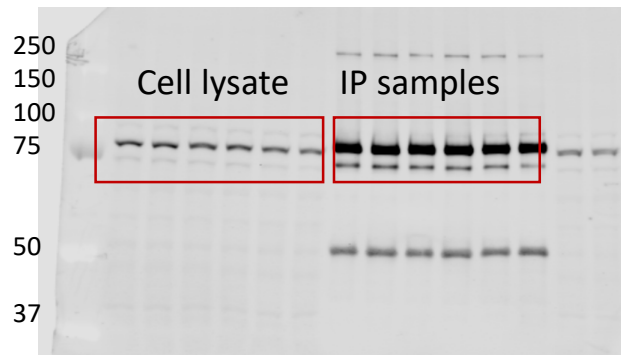

# Uncropped immunoblots from Figure 3d

IB:  $\alpha$ -pSer727 STAT3

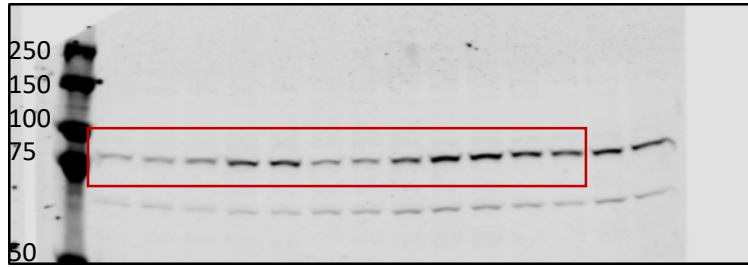

IB:  $\alpha$ -pTyr705 STAT3

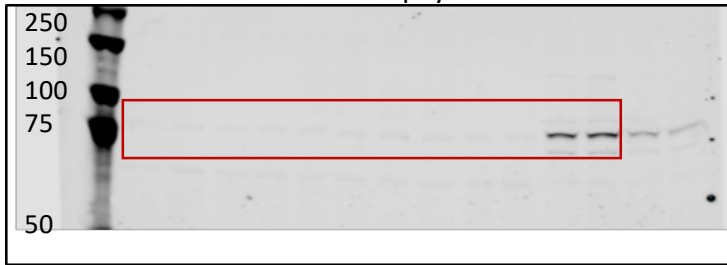

IB:  $\alpha$ -STAT3

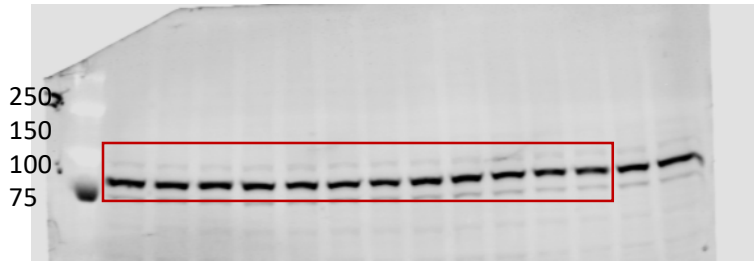

IB:  $\alpha$ -TBK-1

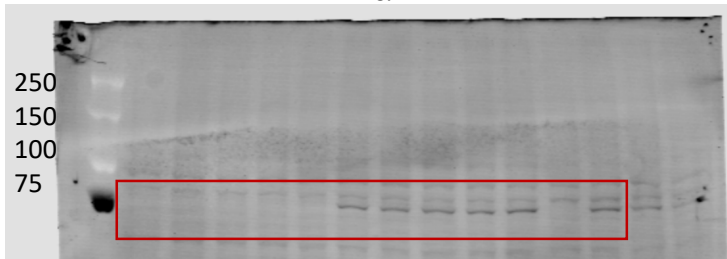

# Uncropped immunoblots from Figure 3e

IB:  $\alpha$ -pS727 STAT3

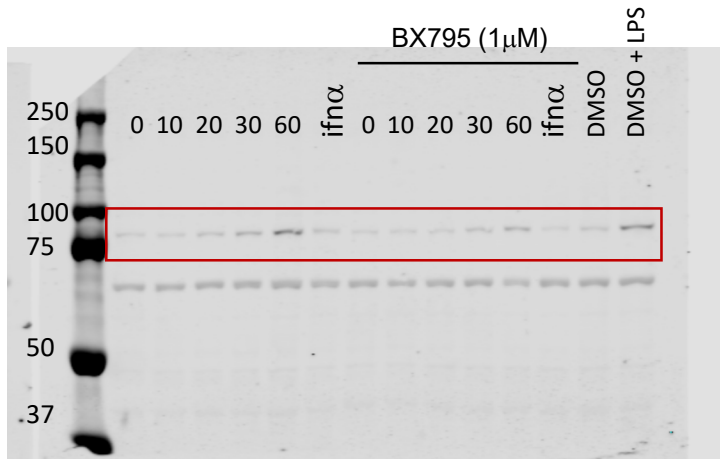

IB:  $\alpha$ -STAT3

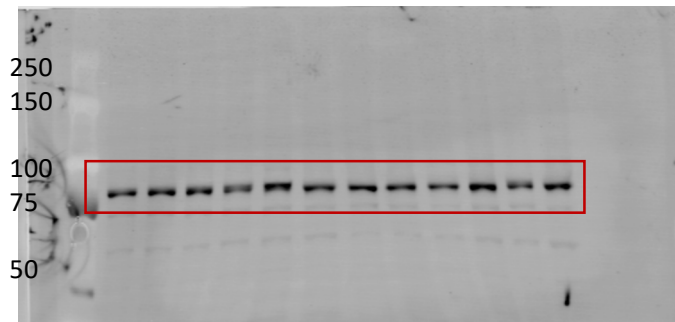

IB:  $\alpha$ -pTBK-1

IB:  $\alpha$ -TBK-1

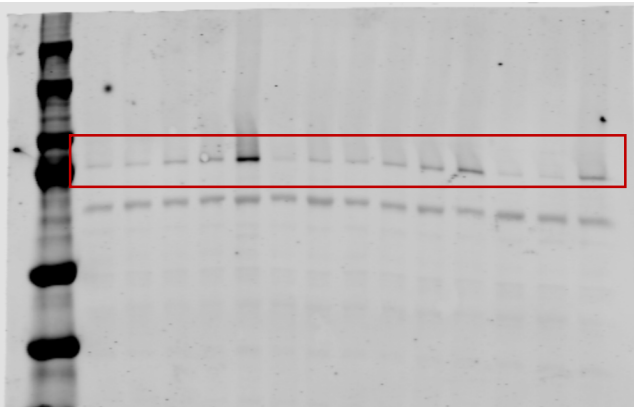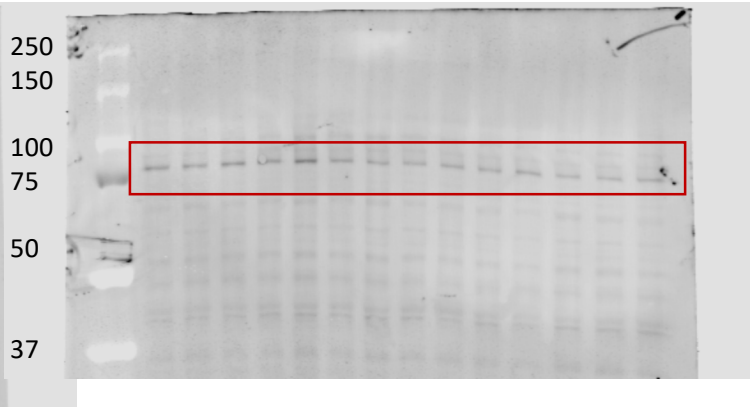



# Uncropped immunoblots from Supplementary Figure 2

IB:  $\alpha$ -pS727 STAT3

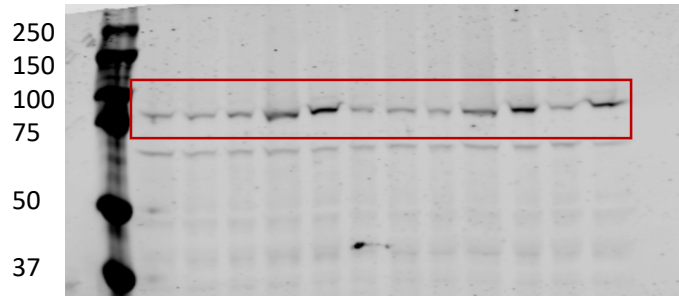

IB:  $\alpha$ -STAT3

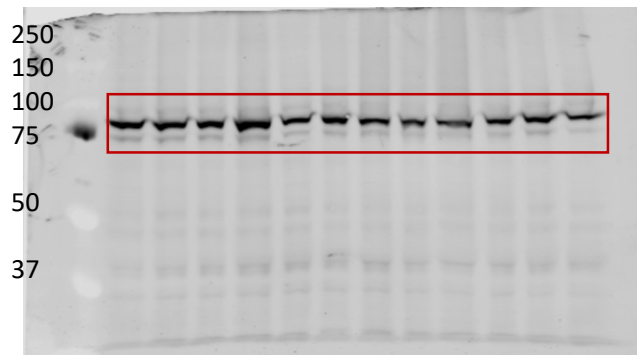

Supplement: 41467_2020_17669_MOESM1_ESM.pdf [file 41467_2020_17669_MOESM1_ESM.pdf]
